# Supplementary material for: COVID-19 vaccination does not affect male sexual functions
Source: Springer Nature journal article supplement (doi:10.1186/s12958-022-01052-8), 2023-01-13
Supplement: MOESM1 [file 12958_2022_1052_MOESM1_ESM.pdf]

## General information

Some recent reports, which associate SARS-CoV-2 infection with erectile dysfunction (ED) (PMID: 34931145), have created fear among people regarding COVID-19 vaccination. However, there is no study investigating the association between COVID-19 vaccination and ED. Therefore, we planned this survey with an aim to bring a clear picture regarding the impact of COVID-19 vaccine on erectile function, if any.

---

\* Required

1. Email /Name\*

---

2. Which age group do you belong to? \*

*Mark only one oval.*

☐ 20-30 years

☐ 30-40 years

☐ 40-50 years

3. Which vaccine have you received?

*Mark only one oval.*

☐ Covishield

☐ Covaxin

☐ Others

☐ None

## 4. When did you receive first dose of vaccine? \*

*Mark only one oval.*

- ☐ About 1 year ago
- ☐ About 9 months ago
- ☐ About 6 months back
- ☐ About 3 months back

### Impact of Covid 19 vaccination on erectile function

## 5. 1a. How often were you able to get an erection during sexual activity?

*Mark only one oval.*

- ☐ No sexual activity
- ☐ Almost never or never
- ☐ A few times (less than half the time)
- ☐ Sometimes (about half the time)
- ☐ Most times (more than half the time)
- ☐ Almost always or always

## 6. 1b. How has the erection frequency changed after covid vaccination?

*Mark only one oval.*

- ☐ No change
- ☐ Positively improved
- ☐ Negatively impacted
- ☐ Can't say

7. 2a. When you had erections with sexual stimulation, how often were your erections hard enough for penetration? \*

*Mark only one oval.*

- ☐ No sexual activity
- ☐ Almost never or never
- ☐ A few times (less than half the time)
- ☐ Sometimes (about half the time)
- ☐ Most times (more than half the time)
- ☐ Almost always or always

8. 2b. How did the hardness of your erection change upon vaccination? \*

*Mark only one oval.*

- ☐ No change
- ☐ Became less hard
- ☐ Became harder
- ☐ Can't say

9. 3a. When you attempted intercourse, how often were you able to penetrate (enter) your partner? \*

*Mark only one oval.*

- ☐ Did not attempt intercourse
- ☐ Almost never or never
- ☐ A few times (less than half the time)
- ☐ Sometimes (about half the time)
- ☐ Most times (more than half the time)
- ☐ Almost always or always

## 10. 3b. How did penetration change after vaccination? \*

*Mark only one oval.*

- ☐ No change
- ☐ Became more successful
- ☐ Became less successful
- ☐ Can't say

## 11. 4a. During sexual intercourse, how often were you able to maintain your erection after you had penetrated(entered) your partner? \*

*Mark only one oval.*

- ☐ Did not attempt intercourse
- ☐ Almost never or never
- ☐ A few times (less than half the time)
- ☐ Sometimes (about half the time)
- ☐ Most times (more than half the time)
- ☐ Almost always or always

## 12. 4b. How did maintenance of erection change after vaccination? \*

*Mark only one oval.*

- ☐ No change
- ☐ Improved
- ☐ Deteriorated
- ☐ Can't say

13. 5a. During sexual intercourse, how difficult was it to maintain your erection to completion of intercourse? \*

*Mark only one oval.*

- ☐ Did not attempt intercourse
- ☐ Extremely difficult
- ☐ Very difficult
- ☐ Difficult Slightly
- ☐ difficultNot
- ☐ difficult

14. 5b. Upon vaccination, how did the maintenance of erection till completion of intercourse change? \*

*Mark only one oval.*

- ☐ No change
- ☐ Improved
- ☐ Deteriorated
- ☐ Can't say

15. 6a. How many times have you attempted sexual intercourse? \*

*Mark only one oval.*

- ☐ No attempts
- ☐ One to two attempts
- ☐ Three to four attempts
- ☐ Five to six attempts
- ☐ Seven to ten attempts
- ☐ Eleven or more attempts

16. 6b. How did the number of intercourse attempts change upon vaccination? \*

*Mark only one oval.*

- ☐ No change
- ☐ Increased
- ☐ Decreased
- ☐ Can't say

17. 7a. When you attempted sexual intercourse, how often was it satisfactory for you? \*

*Mark only one oval.*

- ☐ Did not attempt intercourse
- ☐ Almost never or never
- ☐ A few times (less than half the time)
- ☐ Sometimes (about half the time)
- ☐ Most times (more than half the time)
- ☐ Almost always or always

18. 7b. How did the satisfaction of sexual intercourse change upon vaccination? \*

*Mark only one oval.*

- ☐ No change
- ☐ More satisfcatory
- ☐ Less satisfactory
- ☐ Can't say

19. 8a. How much have you enjoyed sexual intercourse? \*

*Mark only one oval.*

- ☐ No intercourse
- ☐ No enjoyment at all
- ☐ Not very enjoyable
- ☐ Fairly enjoyable
- ☐ Highly enjoyable
- ☐ Very highly enjoyable

20. 8b. How did vaccine change the enjoyment of sexual intercourse? \*

*Mark only one oval.*

- ☐ No change
- ☐ Improved
- ☐ Reduced
- ☐ Can't say

21. 9a. When you had sexual stimulation or intercourse, how often did you ejaculate?  
\*

*Mark only one oval.*

- ☐ No sexual stimulation or intercourse
- ☐ Almost never or never
- ☐ A few times (less than half the time)
- ☐ Sometimes (about half the time)
- ☐ Most times (more than half the time)
- ☐ Almost always or always

22. 9b. How did ejaculation change upon vaccination? \*

*Mark only one oval.*

- ☐ No change
- ☐ Increased frequency
- ☐ Decreased frequency
- ☐ Can't say

23. 10a. When you had sexual stimulation or intercourse, how often did you have the feeling of orgasm or climax? \*

*Mark only one oval.*

- ☐ Almost never or never
- ☐ A few times (less than half the time)
- ☐ Sometimes (about half the time)
- ☐ Most times (more than half the time)
- ☐ Almost always or always

24. 10b. How did the feeling of orgasm or climax change upon vaccination? \*

*Mark only one oval.*

- ☐ No change
- ☐ Became more often
- ☐ Became less often
- ☐ Can't say



25. 11a. How often have you felt sexual desire? \*

*Mark only one oval.*

- ☐ Almost never or never
- ☐ A few times (less than half the time)
- ☐ Sometimes (about half the time)
- ☐ Most times (more than half the time)
- ☐ Almost always or always

26. 11b. How did your sexual desire change upon vaccination? \*

*Mark only one oval.*

- ☐ No change
- ☐ Became more frequent
- ☐ Became less frequent
- ☐ Can't say

27. 12a. How would you rate your level of sexual desire? \*

*Mark only one oval.*

- ☐ Very low or none at all
- ☐ Low
- ☐ Moderate
- ☐ High Very
- ☐ high

28. 12b. Was there a substantial change in your sexual desire \*

*Mark only one oval.*

- ☐ No
- ☐ Yes and increased
- ☐ Yes and decreased
- ☐ Can't say

29. 13a. How satisfied have you been with your overall sex life? \*

*Mark only one oval.*

- ☐ Very dissatisfied
- ☐ Moderately dissatisfied
- ☐ Equally satisfied & dissatisfied
- ☐ Moderately satisfied
- ☐ Very satisfied

30. 13b. Do you feel there was a substantial change in your overall sex life upon vaccination? \*

*Mark only one oval.*

- ☐ No
- ☐ Yes and improved
- ☐ Yes and declined
- ☐ Can't say

31. 14a. How satisfied have you been with your sexual relationship with your partner?

\*

*Mark only one oval.*

- ☐ Very dissatisfied
- ☐ Moderately dissatisfied
- ☐ Equally satisfied & dissatisfied
- ☐ Moderately satisfied
- ☐ Very satisfied

32. 14b. How did vaccination change your sexual satisfaction level with your partner?

\*

*Mark only one oval.*

- ☐ No change
- ☐ Shifted positively
- ☐ Shifted negatively
- ☐ Can't say

33. 15a. How do you rate your confidence that you could get and keep an erection? \*

*Mark only one oval.*

- ☐ Very low
- ☐ Low
- ☐ Moderate
- ☐ High Very
- ☐ high

34. 15b. How has your confidence that you can maintain erection changed? \*

*Mark only one oval.*

☐ No change

☐ Enhanced

☐ Declined

☐ Can't say

---

This content is neither created nor endorsed by Google.

Google Forms
